# Supplementary material for: Pluripotency reprogramming by competent and incompetent POU factors uncovers temporal dependency for Oct4 and Sox2
Source: PubMed Central journal article supplement (PMC6677745; doi:10.1038/s41467-019-11054-7), 2019-08-02
Supplement: 41467_2019_11054_MOESM1_ESM.pdf [file 41467_2019_11054_MOESM1_ESM.pdf]

**Supplementary Information**

**Pluripotency reprogramming by competent and incompetent POU factors uncovers temporal dependency for Oct4 and Sox2**

Malik et al.

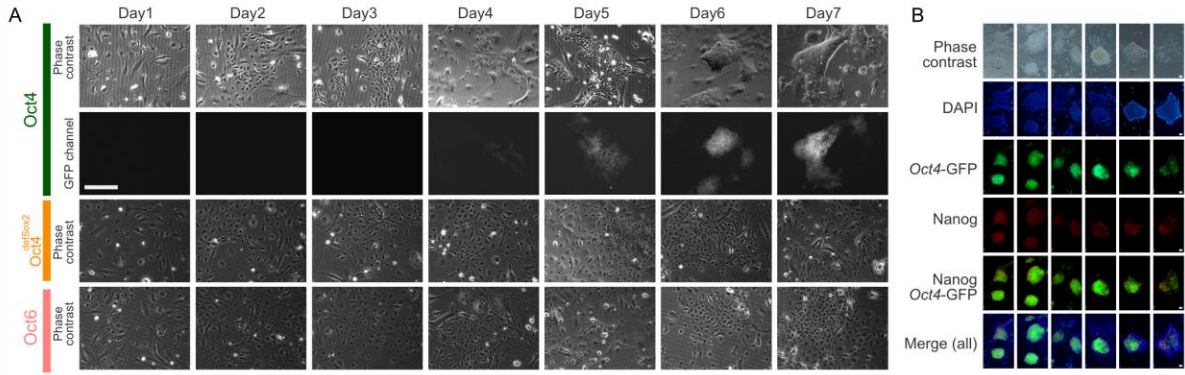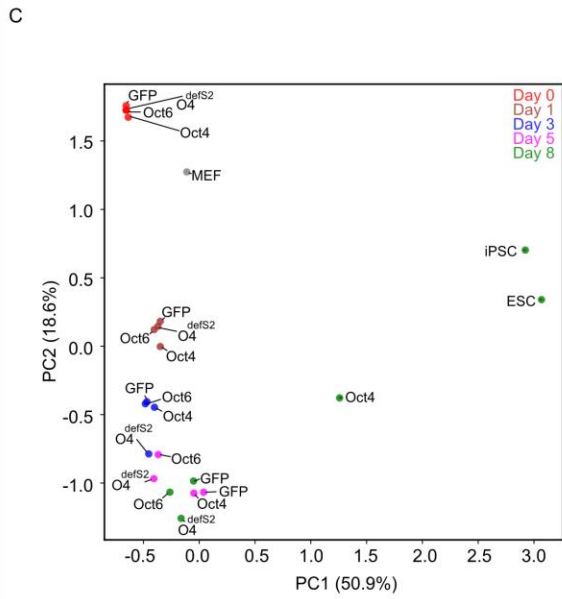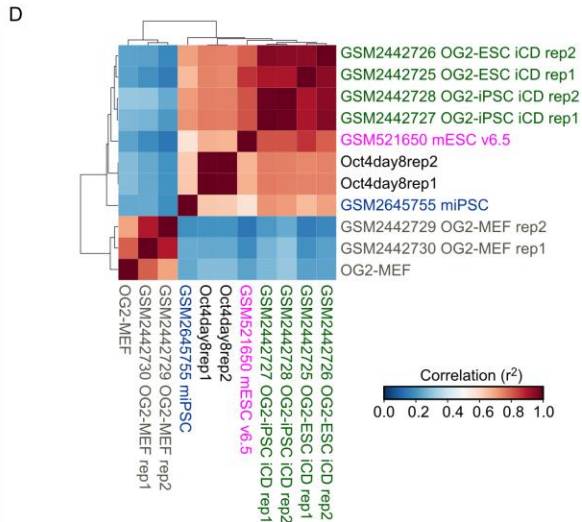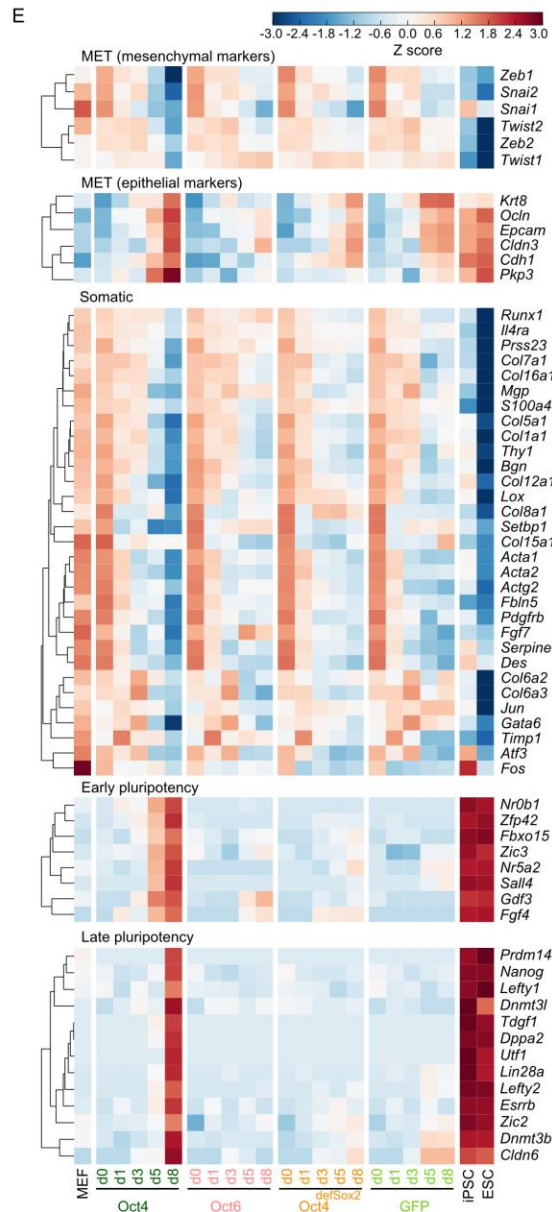

**Supplementary Figure 1. Oct4 is critical for the induction of pluripotency genes at late stage of reprogramming, Related to Figure 1.**

(A) Representative microscopy photographs of cells expressing Oct4-SK, Oct6-SK or Oct4<sup>defSox2</sup>-SK in iCD1 medium taken with phase contrast or GFP (*Oct4*-GFP reporter) channels at indicated days; 10x objective, scale 200  $\mu$ m.

(B) Fluorescence images of *Oct4*-GFP signals and Nanog immunostaining at day 8 of reprogramming in Oct4-SK cells; 10x objective, scale 80  $\mu$ m. The antibodies are in Supplementary Table 11.

(C) Principle component analysis for the RNA-seq gene expression data. Publically available bulk RNA-seq data for iPSC and ESCs<sup>1</sup> are shown as reference.

(D) Hierarchically clustered heatmap based on r<sup>2</sup> correlation coefficients using MEFs and day 8 RNA-seq signals from this study and published bulk ESCs and iPSC cultured in chemically defined or serum/LIF conditions. Prefix in sample name are GEO accession numbers. Culture conditions for these samples are listed in Supplementary Table 1.

(E) Heatmaps show the expression dynamics of selected markers genes for the indicated categories across four reprogramming cocktails. Data are presented as row-wise Z-score.

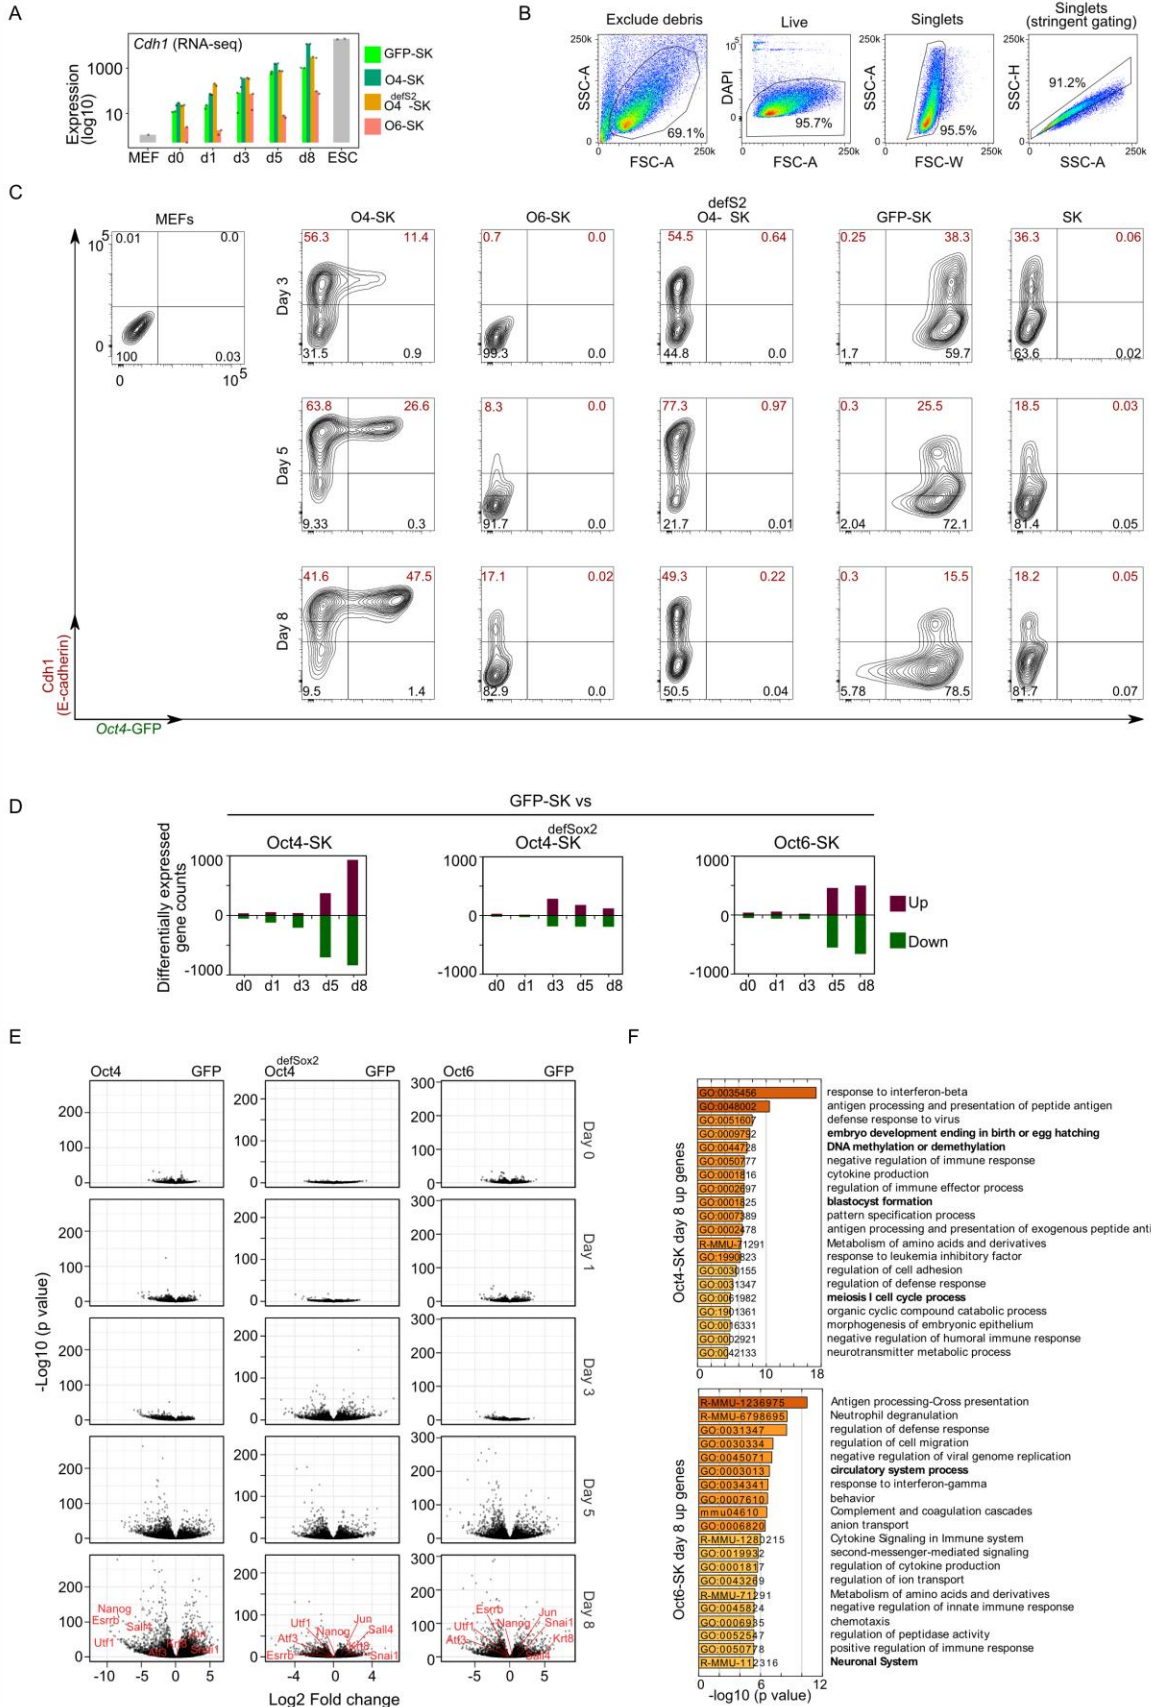

**Supplementary Figure 2. The Oct6-SK condition fails to activate the epithelial program. Related to Figure 1.**

(A) Gene expression (mean tag counts as bar and individual technical replicate as dots) for *Cdh1* (encoding Cadherin-1/E-cadherin) during reprogramming.

(B) Gating strategy for the FACS analysis. FSC=forward-scatter; SSC: side-scatter; A: area; H: height; W: width.

(C) Flow cytometry analysis using the *Oct4*-GFP (OG2) signal and Cadherin-1 expression using reprogramming cells at days 3, 5 and 8 expressing Oct4-SK, Oct6-SK, Oct4<sup>defSox2</sup>-SK, GFP-SK or SK cocktails. For this experiment,  $5.5 \times 10^4$  OG2-MEFs were plated per well of a 6-well plate. Percentage of cells positive or negative for Cadherin-1 and *Oct4*-GFP reporter are indicated in each quadrant. Source data for (B) and (C) are provided as a Source Data file.

(D) The number of differentially expressed (DE) genes at different days of reprogramming is shown as bar plots in GFP-SK versus the three indicated conditions.

(E) Volcano plots of differential gene expression with respect to GFP-SK at indicated days of reprogramming are shown for Oct4-SK (left panel), Oct4<sup>defSox2</sup>-SK (middle) and Oct6-SK (right) conditions. Selected somatic and pluripotency marker genes are labelled at day 8. Differentially expressed gene list is provided in Supplementary Data 1.

(F) GO analysis performed using metascap (http://metascap.org) of genes differentially upregulated (fold change >2) in GFP-SK vs Oct4-SK (upper) and GFP-SK vs Oct6-SK (lower) at day 8.

A

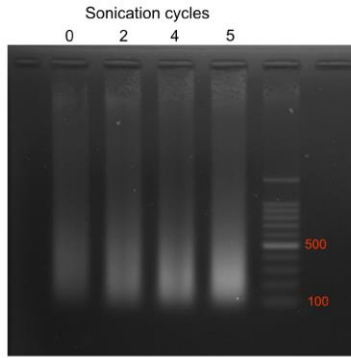

B

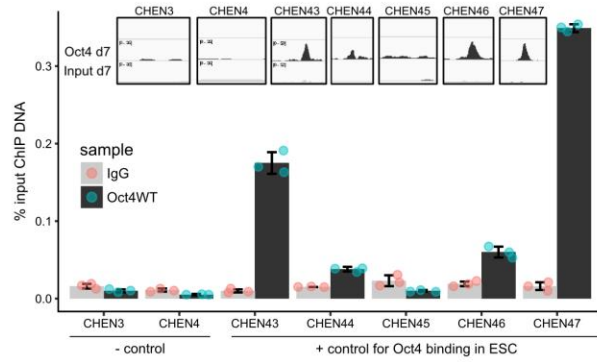

C

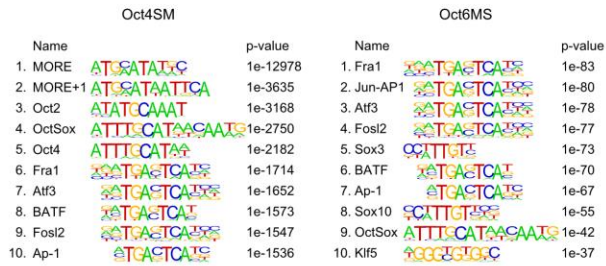

D

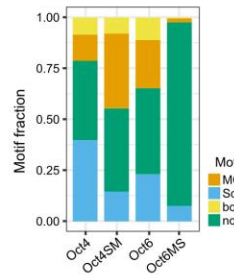

E

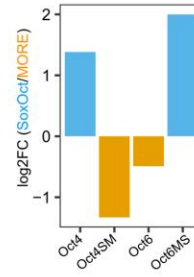

F

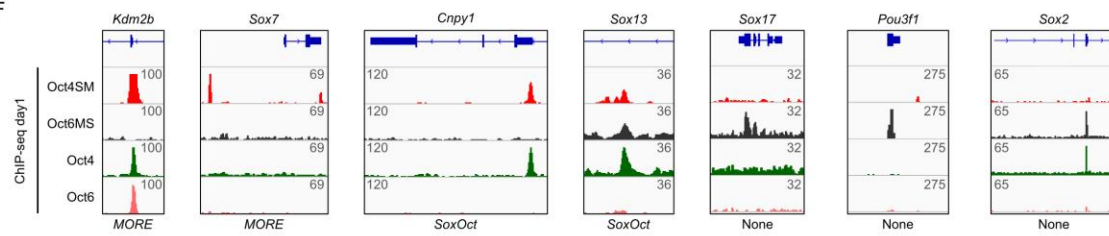

G

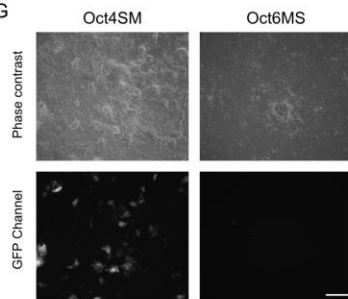

H

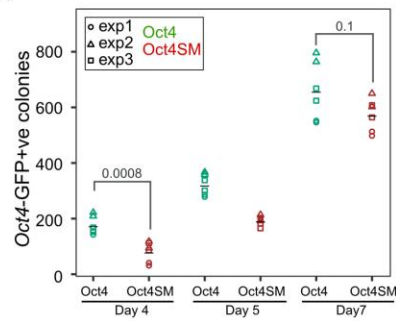

I

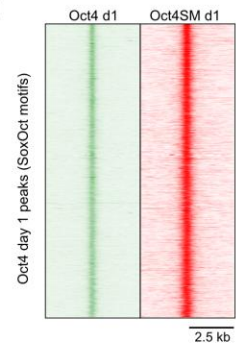

**Supplementary Figure 3. Point mutations switch motif binding preferences for POU factors, Related to Figure 2**

(A) Sonication settings to obtain 100-500 bp DNA fragments for ChIP-sequencing. DNA marker sizes are indicated and lanes are labelled with sonication cycle numbers (Covaris S220 Focused-Ultrasonicator).

(B) ChIP-qPCR at loci reported previously<sup>2</sup>, using the Oct4 antibody at day 7 of reprogramming. Genome browser tracks for day 7 Oct4 ChIP-seq and input signals are shown on top (ChIP-qPCR primers are listed in Supplementary Table 3). Dots represent individual data points (n = 3, technical replicates) and error bars are (mean +/- sd).

(C) Top 10 homer motifs with matches to known motifs and corresponding p-values determined at day 1 ChIP-seq peaks for Oct4<sup>S151M</sup> and Oct6<sup>M151S</sup>. Motifs were re-named from the HOMER database: Pit1 to *MORE*, Pit1+1bp to *MORE+1*.

(D) Fraction of locations containing *MORE* (including *MORE* variants with 0 or 1 bp spacers) or *SoxOct* elements at different reprogramming stages for indicated wild-type and mutant POU factors. ‘Both’ refers to peaks where motif scanning detected *MORE* and *SoxOct* motifs concurrently and ‘none’ the absence of either of the two motifs.

(E) Counts for matches to *SoxOct* and *MORE* motifs in (D) are represented as log2 ratios.

(F) Genome browser tracks of representative location for day 1 ChIP-seq from indicated conditions for loci with different motifs. Genomic coordinates for the summits are given in Supplementary Table 4.

(G) Representative phase contrast and *Oct4*-GFP fluorescence images of cells reprogrammed with Oct4<sup>S151M</sup>-SK and Oct6<sup>M151S</sup>-SK conditions (labelled as Oct4SM and Oct6MS in the figures) at day 8 post transduction. 5x objective, scale 500  $\mu$ m.

(H) *Oct4*-GFP positive colony counts are shown for three independent biological replicates each consisting of two technical replicates (n = 6) at days 4, 5 and 7. Student’s t-test (two tailed, unpaired, with assumption of equal variance) was performed to assess significance.

(I) ChIP-seq signal heatmap for Oct4-SK and Oct4<sup>S151M</sup>-SK conditions at day 1 of reprogramming. Rows are Oct4 peaks containing *SoxOct* motifs.

Source data are provided as a Source Data file for (B) and (H).

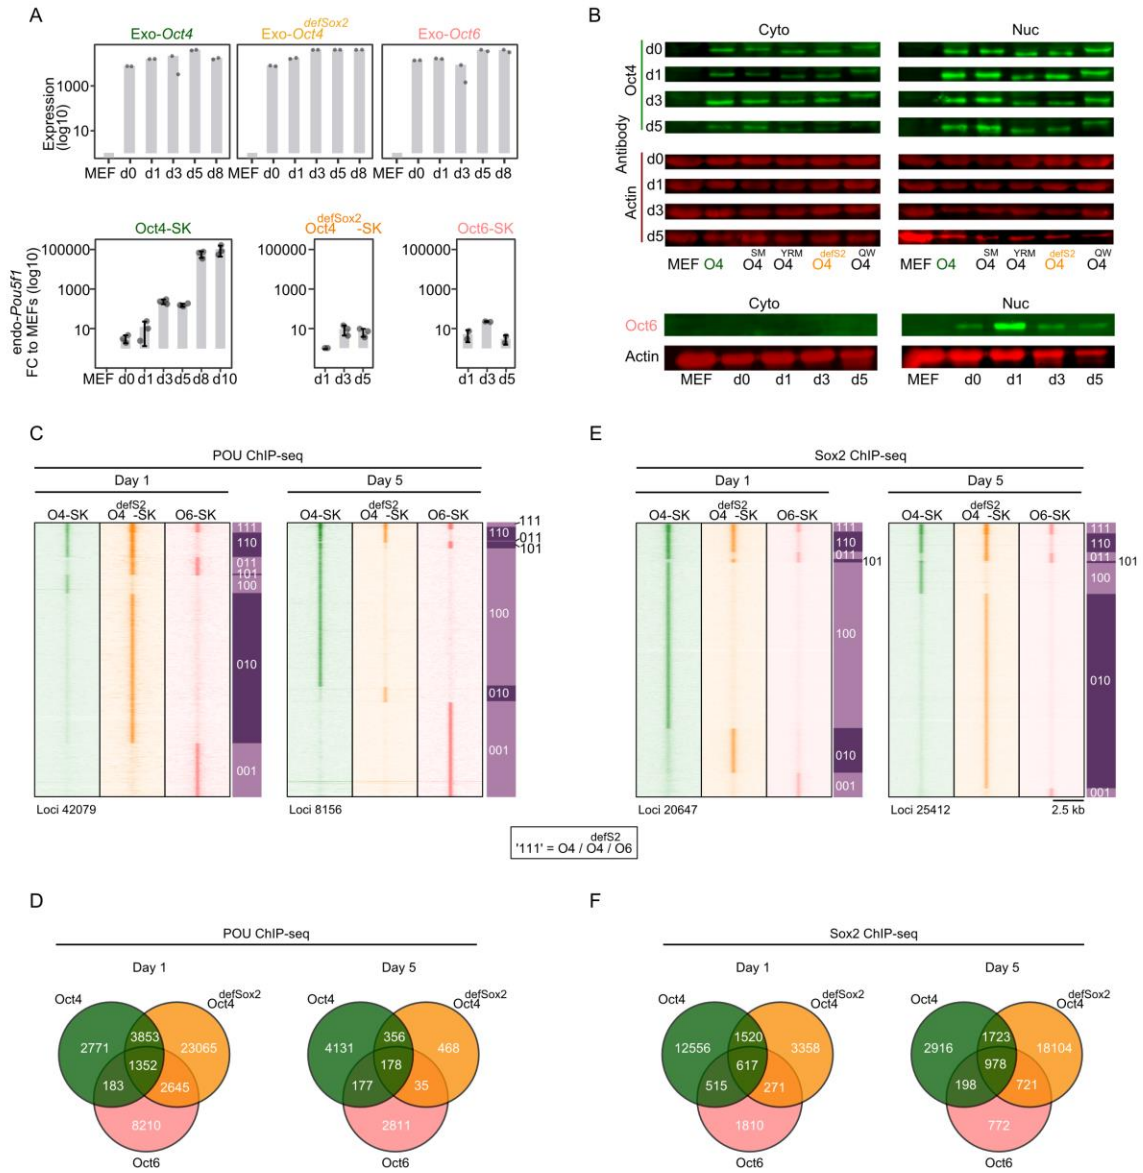



**Supplementary Figure 4. Reprogramming incompetent POU factors are re-distributed to disparate binding sites, Related to Figure 3**

(A) Gene expression of total *Oct4* (from Oct4-SK and Oct4<sup>defSox2</sup>-SK expressing cells) and total *Oct6* (from Oct6-SK expressing cells) shown as mean normalized tag counts from replicate RNAseq experiments (upper panel, individual technical replicate as dots). The lower panels show the expression of endogenous *Oct4* in the three conditions determined by qRT-PCR (mean +/- sd; n = 3 biological replicates). qRT-PCR primers are listed in Supplementary Table 9.

(B) Western blots showing distribution of POU proteins in cytoplasmic (Cyto) and nuclear (Nuc) fractions at indicated days of reprogramming. Actin was used as housekeeping protein control. O4SM corresponds to the Oct4<sup>S151M</sup> protein (Supplementary Figures 3C-I) and O4<sup>YRM</sup> and O4<sup>QW</sup> are Oct4 mutants not further discussed in this manuscript but were analysed in the same Western blot.

(C) Heatmap of intersections of ChIP-seq peaks for POU factors in indicated conditions at days 1 and 5 of reprogramming. Rows are the union of POU peak summits in Oct4-SK, Oct4<sup>defSox2</sup>-SK and Oct6-SK conditions at days 1 and 5 of reprogramming arranged in 7 binary occupancy trajectories. 1 indicates presence and 0 absence of binding; digits from left to right are Oct4-SK, Oct4<sup>defSox2</sup>-SK and Oct6-SK conditions. Adjacent summits were merged if they were within 400bp. ChIP-seq signals are shown in 5 kb window centred at peak summits.

(D) Venn diagrams of ChIP-seq peaks overlap of POU factors of this study at day 1 (left) and day 5 (right).

(E) Same as (C) but done for Sox2 ChIP-seq in Oct4-SK, Oct6-SK and Oct4<sup>defSox2</sup>-SK conditions at days 1 and 5 of reprogramming.

(F) Similar to (E) but here Venn diagrams represent Sox2 ChIP-seq peaks intersections at day 1 (left) and day 5 (right) of reprogramming.

Genomic locations for (C) and (E) are provided in Supplementary Data 2. Source data for (A, lower panel) and (B) are provided as a Source Data file.

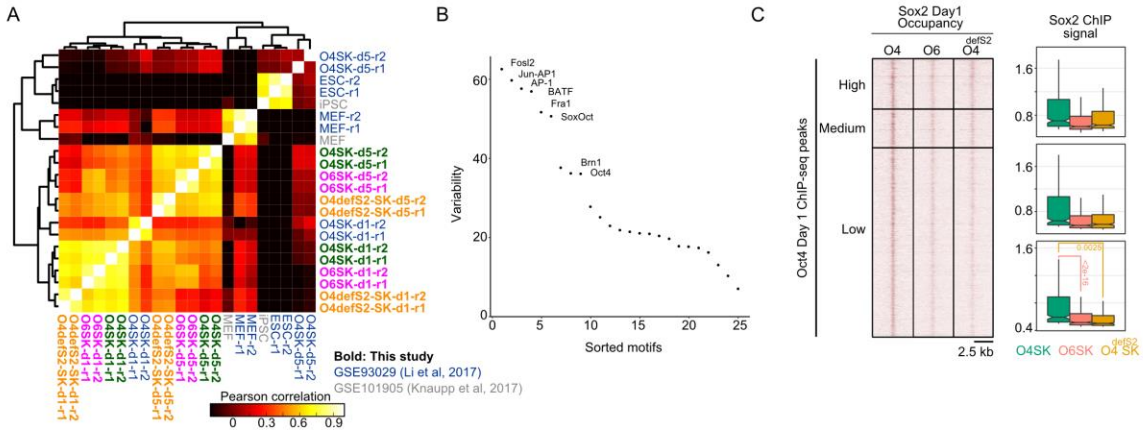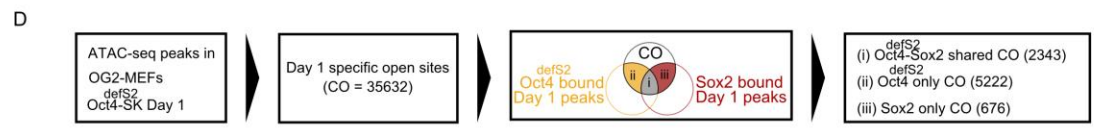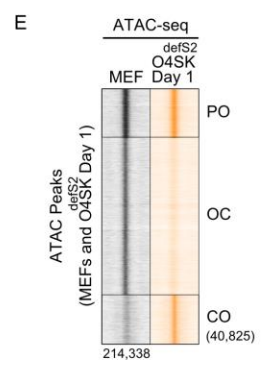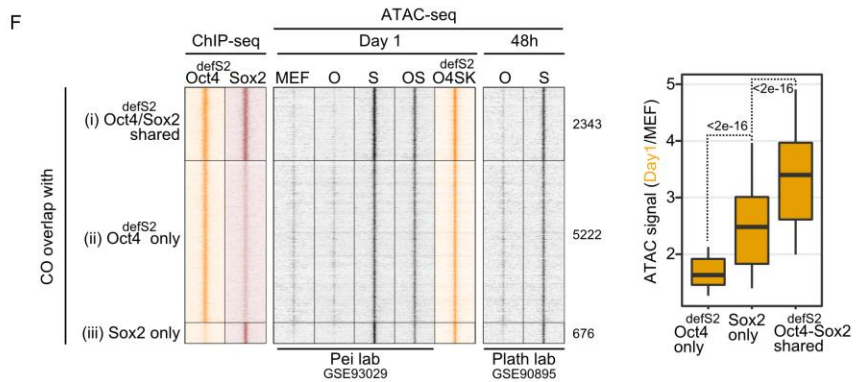

**Supplementary Figure 5. Chromatin dynamics in the ‘Oct4<sup>defSox2</sup> –SK condition, Related to Figure 4**

(A) Hierarchical clustering of the pairwise correlation coefficients ( $R^2$ ) of Oct4-SK, Oct4<sup>defSox2</sup>-SK and Oct6-SK ATAC-seq peaks from this study (bold font) as well as publicly available ATAC-seq data from Knaupp et al (grey) and Li et al (blue)<sup>1,3</sup>. r1 and r2 denote replicates.

(B) Ranked accessibility variation determined by chromVAR for day 1 and 5 ATAC-seq peaks of the three conditions (Oct4-SK, Oct4<sup>defSox2</sup>-SK and Oct6-SK) marked by a selection of motifs taken from the HOMER database with high variability.

(C) Sox2 ChIP-seq signal from three POU-SK conditions are plotted as heatmap and boxplots on day 1 Oct4 ChIP-seq peaks grouped by their accessibility in MEFs.

(D) Analysis flow chart for defining the closed-to-open (CO) location using MEF and day 1 Oct4<sup>defSox2</sup>-SK ATAC-seq peaks followed by grouping for Oct4<sup>defSox2</sup>/Sox2 day 1 binding.

(E) ATAC-seq signal heatmaps for the three accessibility trajectories.

(F) The CO category from (F) was grouped by ChIP-seq peaks of Oct4<sup>defSox2</sup> and Sox2 (in Oct4<sup>defSox2</sup>-SK) at day 1. ChIP-seq and ATAC-seq signal heatmaps are shown for these groups at the indicated conditions. Boxplots represent Oct4<sup>defSox2</sup>-SK/MEF ATAC-seq signal ratios at the three peak sets. The ATAC-seq samples for MEFs and day 1 (O, S, OS) were downloaded from GSE93029<sup>1</sup> and at 48 hours (O, S) from GSE90895<sup>4</sup>.

ATAC-seq and Sox2 ChIP-seq signals were normalized by EASEq (DNA fragments per kilobase pairs (kbp) per million (M) reads) and POU ChIP-seq signals were quantile normalized. P-values in (C, F), were calculated using pairwise comparisons with the unpaired Wilcoxon rank sum test (R function pairwise.wilcox.test) and adjusted for multiple testing using the Holm method. Genomic locations for (E, F) are provided in Supplementary Data 2. For the boxplots, the midline indicates the median, boxes indicate the upper and lower quartiles and the whiskers indicate 1.5 times interquartile range.

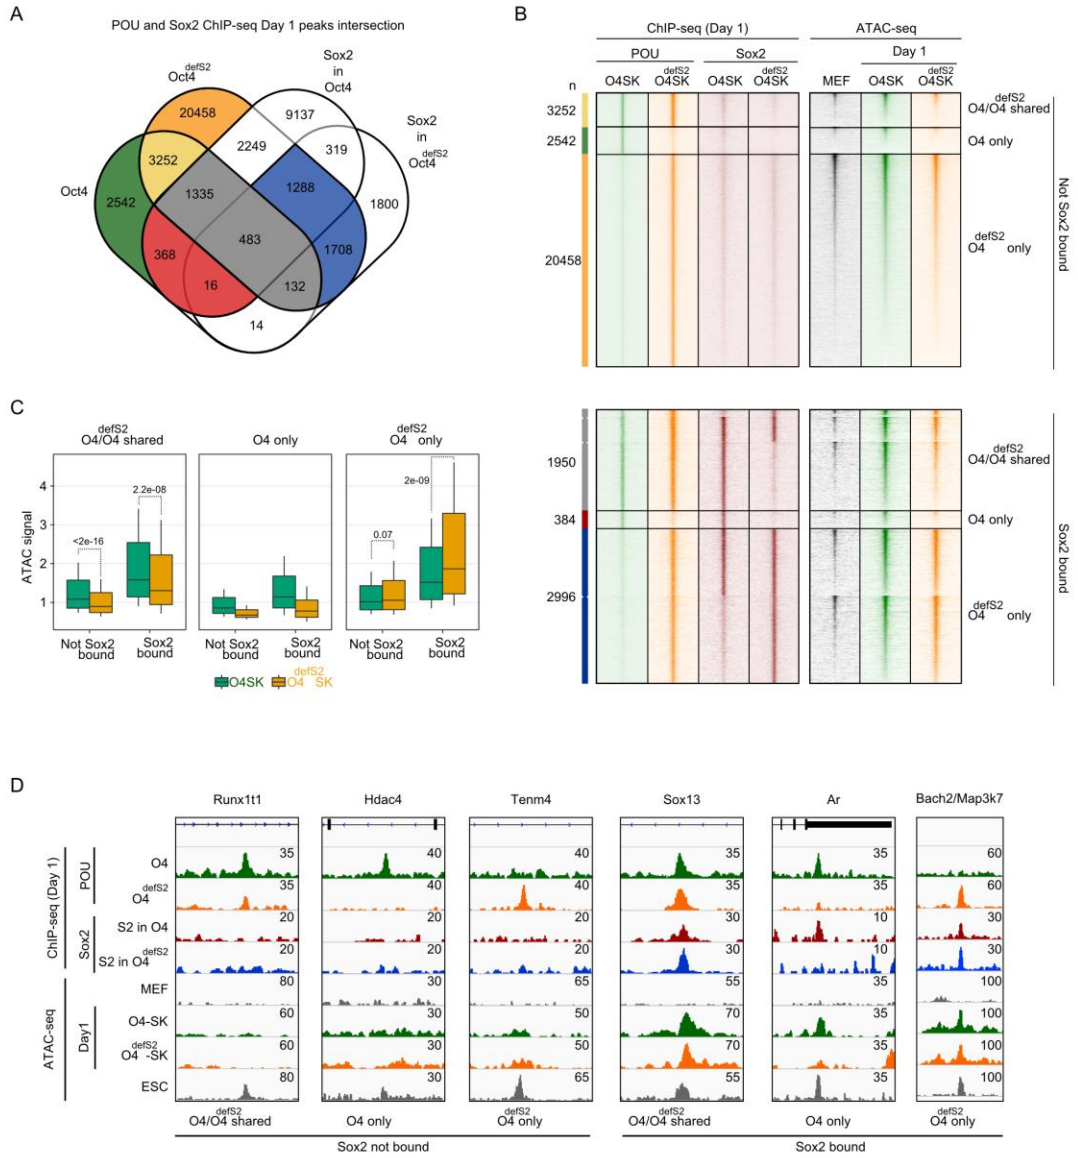

**Supplementary Figure 6. Oct4<sup>defSox2</sup> interfere with Sox2 mediated chromatin opening, Related to Figure 4**

(A) ChIP-seq peaks at day 1 for Oct4, Oct4<sup>defSox2</sup>, Sox2 in Oct4 and Sox2 in Oct4<sup>defSox2</sup> conditions were intersected and peak numbers are represented as Venn diagram. Six main binding site categories are highlighted with six different colours.

(B) ChIP-seq peaks for Oct4, Oct4<sup>defSox2</sup> were intersected to define common and specific sites further grouped by the absence (upper heatmaps) or presence of Sox2 binding (lower heatmaps). ChIP-seq and ATAC-seq signals are visualised as heatmaps over these binding categories for the indicated conditions. The MEFs sample in grey is from GSE93029<sup>1</sup>. Bars to the left are color coded as the six categories in the Venn diagram in (A).

(C) Boxplot for comparing the ATAC-seq signals in (B) for common and specific Oct4/Oct4<sup>defSox2</sup> peaks in the absence or presence of Sox2. For the boxplots, the midline indicates the median, boxes indicate the upper and lower quartiles and the whiskers indicate 1.5 times interquartile range.

(D) Genome browser tracks showing examples for the six binding categories.

P-values in (C) were calculated using the unpaired Wilcoxon rank sum test (R function `pairwise.wilcox.test`) and adjusted for multiple testing using the Holm method. ATAC-seq boxplots show signals normalised using EAsseq (DNA fragments per kilobase pairs (kbp) per million (M) reads) Genomic locations for (B) are provided in Supplementary Data 2 and coordinates for ChIP-seq peaks in (D) are listed in Supplementary Table 4.

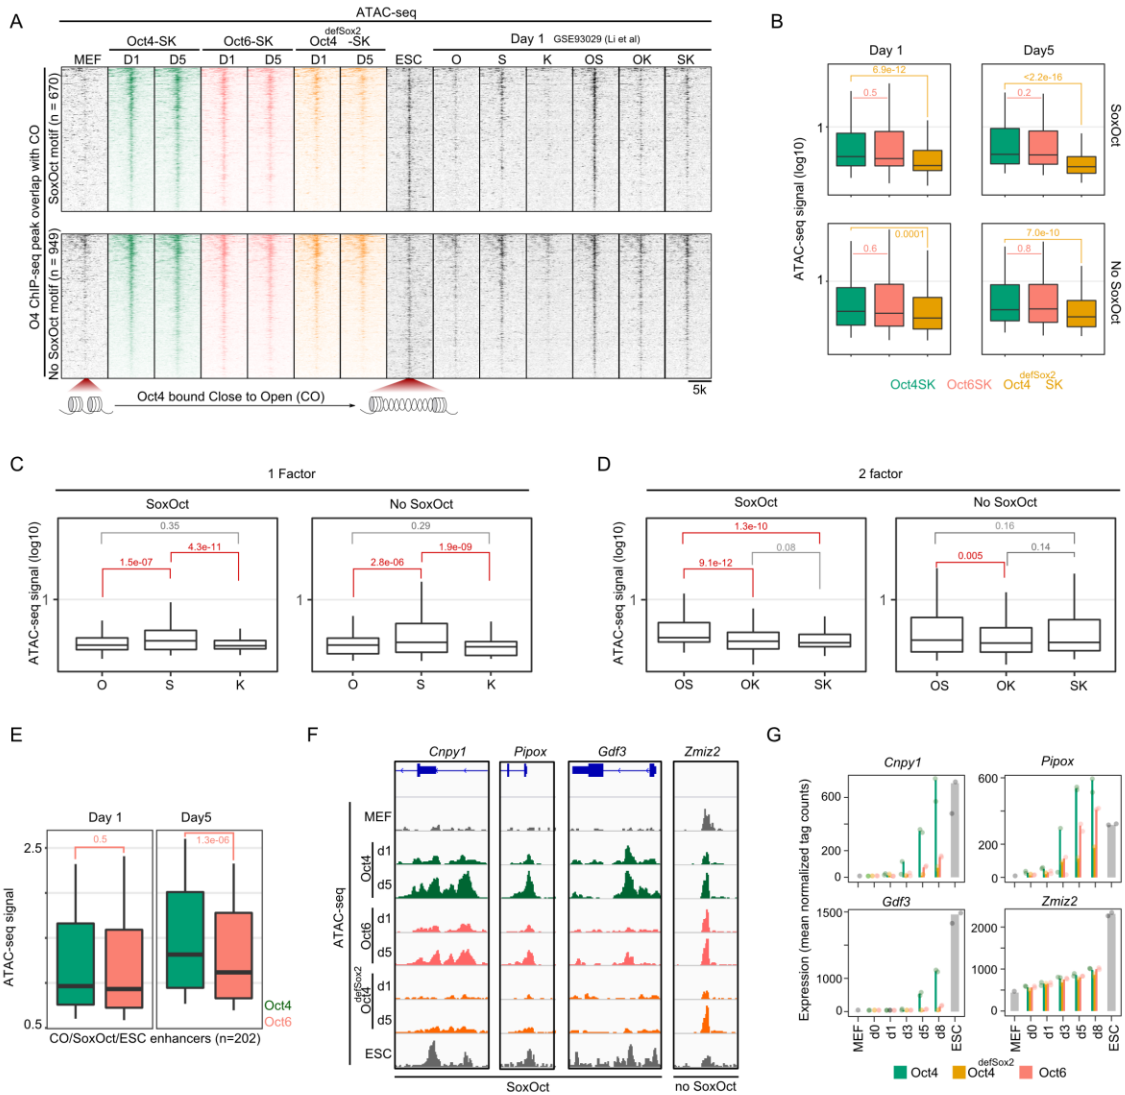

**Supplementary Figure 7. Chromatin accessibility at sites containing *SoxOct* motifs, Related to Figure 4**

(A) Heatmaps of ATAC-seq signal in indicated conditions over the Oct4 bound ChIP-seq peak locations that overlapped with the CO (close-to-open in MEFs to ESCs) category (defined in GSE93029<sup>1</sup>) and further separated into peaks with *SoxOct* motif (upper panel) and without *SoxOct* motif (lower panel). The ATAC signal in MEFs, ESCs, 1F (O, S, K) and 2F (OS, OK, SK) cocktails are from GSE93029. Genomic locations are provided in Supplementary Data 2.

(B) ATAC-seq signal boxplot in Oct4-SK, Oct6-SK and Oct4<sup>defSox2</sup>-SK conditions at days 1 and 5 for CO sites with or without *SoxOct* motif.

(C-D) ATAC-seq signal at day 1 are shown as boxplot from one factor (C) or two factors (D) cocktails over the loci defined in A. The ATAC-seq signal for one factor (in O, S, K) and two factors (in OS, OK, SK) cocktails are from GSE93029.

(E) Oct4-SK and Oct6-SK ATAC-seq signal boxplots for *SoxOct* sites from (A) which intersect with mouse ESC enhancers as defined in<sup>5</sup> (n = 202).

(F) ATAC-seq signal tracks for representative locations with or without *SoxOct* motifs. Genomic coordinates for the summits are listed in Supplementary Table 4.

(G) RNA-seq expression (mean normalized tag counts) for genes associated with the ChIP-seq peaks in (F). RNAseq replicates (n = 2, technical replicates) are shown as individual data points. The boxplots for ATAC-seq signals are normalized using EASeq (DNA fragments per kilobase pairs (kbp) per million (M) reads). P-values in (B-D) were calculated by pairwise comparisons with the unpaired Wilcoxon rank sum test (R function `pairwise.wilcox.test`) and adjusted for multiple testing using the Holm method. For the boxplots, the midline indicates the median, boxes indicate the upper and lower quartiles and the whiskers indicate 1.5 times interquartile range.

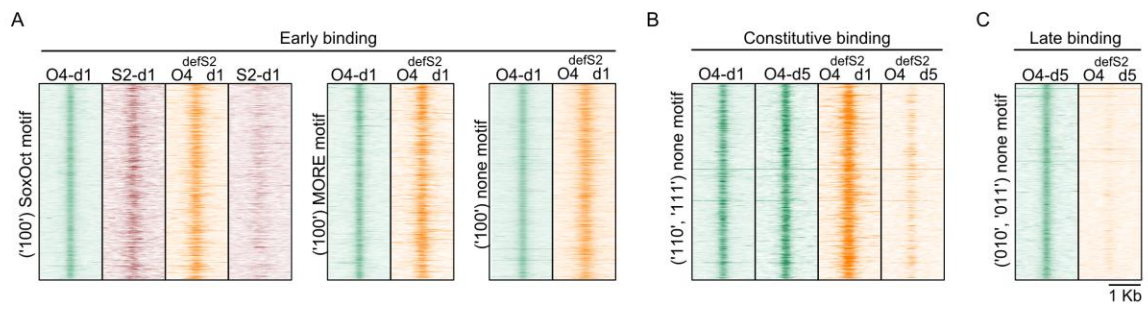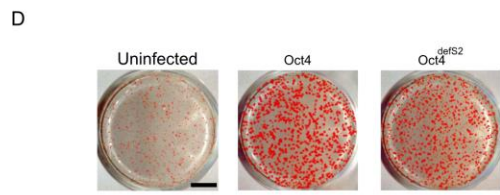



**Supplementary Figure 8. Oct4<sup>defSox2</sup> mirrors Oct4 binding at day 1 but not at day 5, Related to Figure 5**

(A) Oct4, Oct4<sup>defSox2</sup> and corresponding Sox2 ChIP-seq signals for the Oct4 occupancy trajectories separated for subsets containing matches to the *SoxOct* motif (left panel), *MORE* motif (middle panel) or lacking either motif ('none', right panel).

(B-C) As in (A) for locations lacking any POU motif ('none') in the constitutively bound ('110' and '111') trajectories (B) or late bound ('010' and '011') trajectories (C).

ChIP-seq signal are displayed with a window of 2 kb centered on the motifs (A-C).

(D) Complementation assay showing whole well images of ZHBTc4<sup>6</sup> ESCs stained with alkaline phosphatase after culturing for 6 days in the presence of Dox to suppress transgenic *Oct4* and transduced with lentiviruses expressing Oct4, Oct4<sup>defSox2</sup> and an un-transduced control (passage 1); scale 5mm.

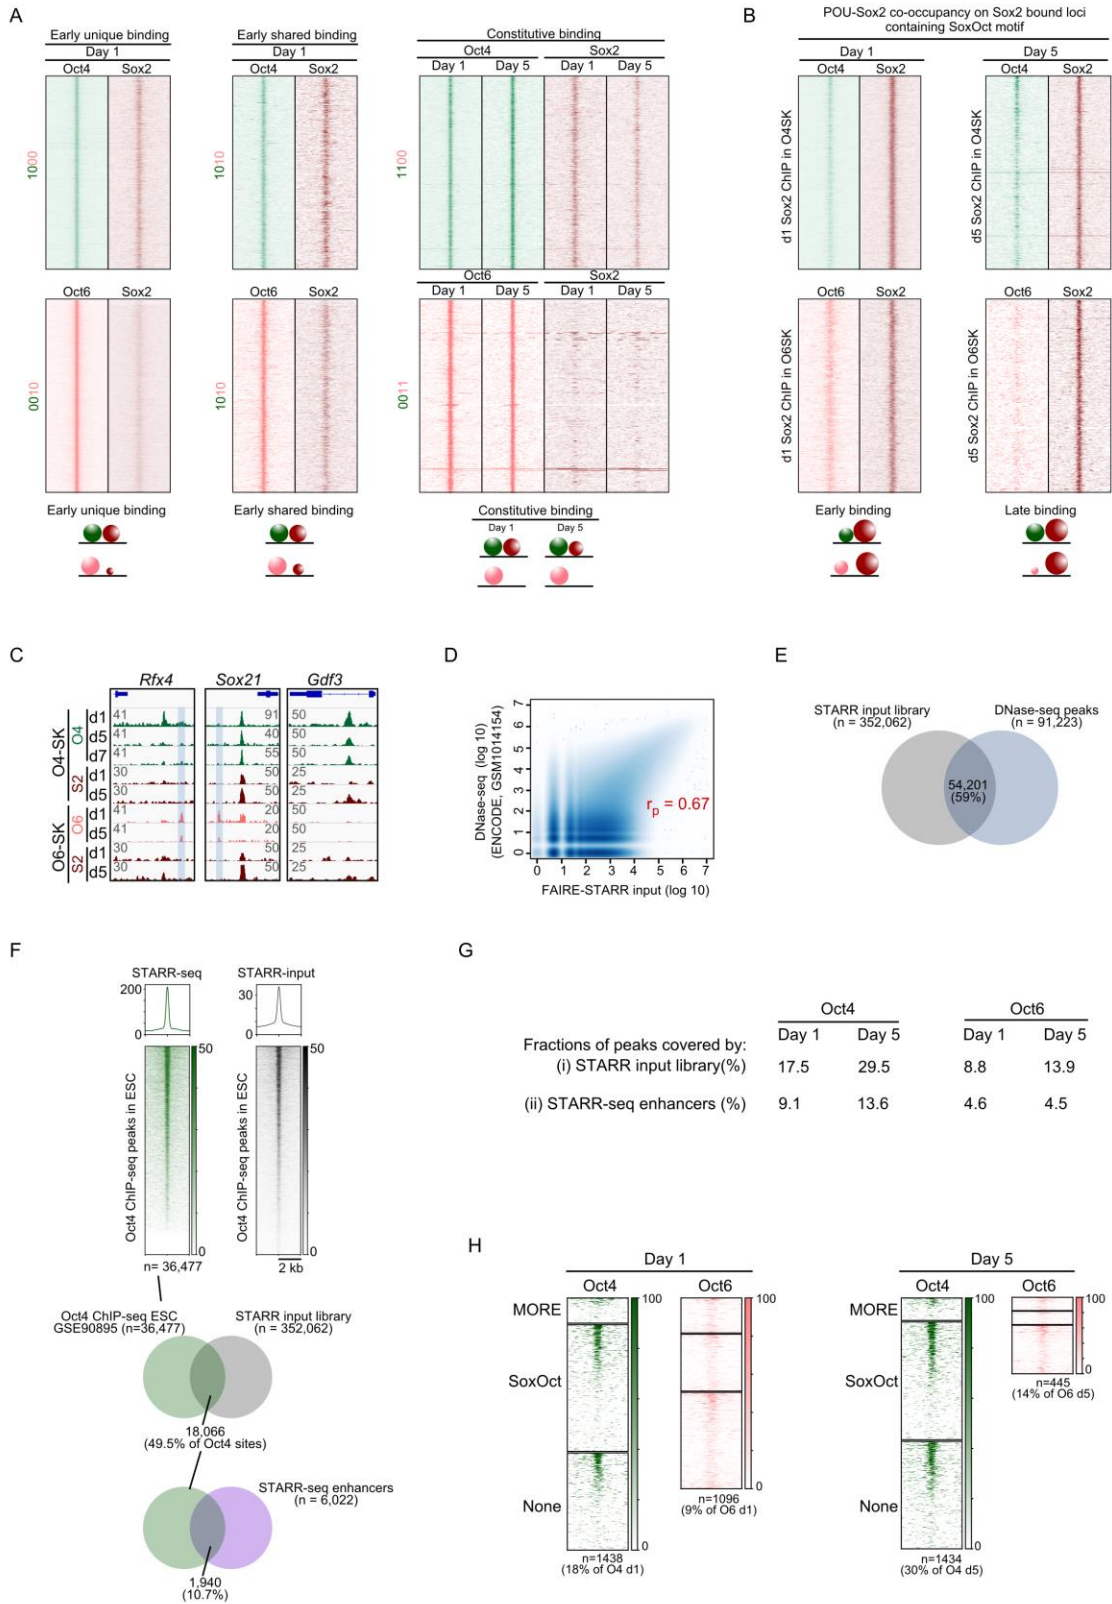

### Supplementary Figure 9. Comparison of binding patterns and enhancer association of Oct4 and Oct6, Related to Figure 6

(A) ChIP-seq signals for Oct4 (top) and Oct6 (bottom) and with corresponding Sox2 signals. Rows are the indicated occupancy groups and represent sets that are exclusive for Oct4 or Oct6 (Oct4 early: '1000' and Oct4 constitutive: '1100'; Oct6 early: '0010' and Oct6 constitutive: '0011') or shared (Oct4/Oct6 early shared: '1010', middle panel).

(B) ChIP-seq signal heat maps of Oct4 (top), Oct6 (bottom) and corresponding Sox2 occupancy at days 1 (left) and 5 (right). Rows are Sox2 ChIP-seq peaks containing *SoxOct* motifs called in Oct4 (top) or Oct6 (bottom) conditions.

(C) Genome browser tracks showing Oct4, Oct6 and respective Sox2 ChIP-seq signals.

Heatmaps in (A) and (B) show normalised ChIP-seq signals in a 5 kb window centered at peak summits or midpoints of merged occupancy trajectories. Genomic coordinates for the summits are given in Supplementary Table 4.

(D) Scatter plot showing the correlation of FAIRE-STARR-input (Formaldehyde-Assisted Isolation of Regulatory Elements-Self-transcribing active regulatory region sequencing) library and DNase-seq (DNase I hypersensitive sites sequencing, GSM1014154<sup>7</sup>) from E14 mESC. The Pearson's correlation coefficient is indicated.

(E) Venn representing the intersection of STARR input library and DNase-Seq peaks downloaded from GSM1014154<sup>7</sup>) from E14 mESC.

(F) Heatmaps showing STARR-seq and STARR-input library signal on Oct4 bound ChIP-seq peaks in ESCs (GSE90895<sup>4</sup>). The Venn shows the intersection of Oct4 ChIP-seq peaks with STARR-input library (middle panel) and with STARR-seq enhancers (lower panel).

(G) Fraction of peaks from Oct4 and Oct6 ChIP-seq at days 1 and 5 as present in STARR-input and STARR-seq enhancers are indicated in percentages.

(H) Heatmaps showing the STARR-seq signal at the Oct4 and Oct6 ChIP-seq peaks at days 1 and 5 containing matches to *SoxOct*, *MORE* or to none of the two POU motifs ('none'). STARR-seq enhancer signals were normalized with the STARR-input library prepared using accessible regions in ESCs generated by FAIRE<sup>8</sup>. Number and fraction of ChIP-seq peaks overlapping with the STARR input library are indicated underneath the heatmaps.

## Supplemental tables

**Supplementary Table 1:** RNA-seq expression data from ESCs or iPSCs from various labs used as reference; related to Supplementary Figure 1D

| ES cells  | GEO ID     | Culture medium                                                         | Reference PMID          |
|-----------|------------|------------------------------------------------------------------------|-------------------------|
| OG2-ESC   | GSM2442725 | Feeder-free + mES medium + N2B27-2i + 50% KO-DMEM +LIF                 | Pei Lab <sup>1</sup>    |
| OG2-ESC   | GSM2442726 |                                                                        |                         |
| OG2-iPSC  | GSM2442727 |                                                                        |                         |
| OG2-iPSC  | GSM2442728 |                                                                        |                         |
| OG2-MEF   | GSM2442729 |                                                                        |                         |
| OG2-MEF   | GSM2442730 |                                                                        |                         |
| miPSC     | GSM2645755 | Gelatin + mES medium + 15% Serum/LIF or KOSR                           | Loh Lab <sup>9</sup>    |
| mESC v6.5 | GSM521650  | Feeder and Gelatin + mES medium + 15% serum/LIF (No feeder for RNAseq) | Regev lab <sup>10</sup> |

**Supplementary Table 2:** The statistics of ChIP-seq and ATAC-seq libraries, related to Figures 2-6.

| ChIP                        | Sample                      | Day     | Total reads            | Mapped deduplicated reads | Peaks      |
|-----------------------------|-----------------------------|---------|------------------------|---------------------------|------------|
| NA                          | Input                       | Day1    | 38,571,244             | 27,261,634                | NA         |
|                             |                             | Day5    | 55,348,888             | 39,444,104                | NA         |
|                             |                             | Day7    | 10,673,894             | 5,391,334                 | NA         |
| POU                         | Oct4-SK                     | Day1    | 145,752,200            | 103,162,315               | 8,216      |
|                             |                             | Day5    | 53,766,238             | 35,730,624                | 4,854      |
|                             |                             | Day7    | 37,861,452             | 27,801,082                | 3,638      |
|                             | Oct6-SK                     | Day1    | 20,242,068             | 11,023,192                | 12,421     |
|                             |                             | Day5    | 8,931,144              | 6,061,399                 | 3,201      |
|                             | Oct4 <sup>defSox2</sup> -SK | Day1    | 61,519,736             | 29,364,810                | 31,070     |
|                             |                             | Day5    | 57,585,040             | 37,885,413                | 1,038      |
|                             | Oct4-SM                     | Day1    | 17,476,923             | 8,896,050                 | 101,170    |
|                             | Oct6-MS                     | Day1    | 38,503,128             | 27,947,258                | 22,804     |
|                             | Sox2                        | Oct4-SK | Day1                   | 34,827,014                | 16,460,243 |
| Day5                        |                             |         | 41,657,078             | 26,819,329                | 5,832      |
| Oct6-SK                     |                             | Day1    | 42,255,790             | 27,743,698                | 3,242      |
|                             |                             | Day5    | 44,787,304             | 22,851,318                | 2,673      |
| Oct4 <sup>defSox2</sup> -SK |                             | Day1    | 40,845,998             | 25,629,308                | 5,794      |
|                             |                             | Day5    | 46,145,438             | 23,797,151                | 21,563     |
| ATAC                        | Sample                      | Day     | Total reads (millions) | Mapped deduplicated reads | Peaks      |
| Rep 1                       | Oct4-SK                     | Day1    | 75.9M                  | 34,580,294                | 106,506    |
|                             |                             | Day5    | 84.2M                  | 45,677,945                | 108,631    |
|                             | Oct6-SK                     | Day1    | 80.3M                  | 33,337,802                | 127,909    |
|                             |                             | Day5    | 79.8M                  | 39,431,759                | 109,793    |
|                             | Oct4 <sup>defSox2</sup> -SK | Day1    | 79.5M                  | 28,032,791                | 112,635    |
|                             |                             | Day5    | 77.3M                  | 41,912,868                | 118,955    |
| Rep 2                       | Oct4-SK                     | Day1    | 76.1M                  | 32,409,546                | 100,393    |
|                             |                             | Day5    | 82.2M                  | 41,715,636                | 119,178    |
|                             | Oct6-SK                     | Day1    | 93.5M                  | 35,909,929                | 138,081    |
|                             |                             | Day5    | 76.0M                  | 36,836,777                | 103,663    |
|                             | Oct4 <sup>defSox2</sup> -SK | Day1    | 80.6M                  | 25,920,426                | 101,589    |
|                             |                             | Day5    | 81.5M                  | 42,887,789                | 123,920    |

**Supplementary Table 3:** ChIP-qPCR primers; related to Supplementary Figure 3B

| Primer name        | Sequence 5' → 3'               |
|--------------------|--------------------------------|
| ChIP-qPCR_Chén3_F  | AGTGGGCGGCTTGAGGGCTCAGTCTAAAT  |
| ChIP-qPCR_Chén3_R  | CTCTTCCTACCGTGTGGGCTTCAGGGATGC |
| ChIP-qPCR_Chén4_F  | ACTTTCCTCAGGGTTCCTTGGTGCG      |
| ChIP-qPCR_Chén4_R  | TCAGGCAATTCACGGGAATCGGTTATCATA |
| ChIP-qPCR_Chén43_F | GCAATGGTTAAGCGAGGTTACAGGAACACA |
| ChIP-qPCR_Chén43_R | AACCCTAAGGCCAGGATGGTCAGTAG     |
| ChIP-qPCR_Chén44_F | GCCATTGTGATGCATATAGGATTATTCACG |
| ChIP-qPCR_Chén44_R | AACATATACATTTTATACTGTCCATTGGCT |
| ChIP-qPCR_Chén45_F | TGTAGCCAGCAGACAGGACAAATATCCCTT |
| ChIP-qPCR_Chén45_R | CCAAGACCACCAAAGTTCCACCTACCCTC  |
| ChIP-qPCR_Chén46_F | GGGGTGGGACAGTGACATCTAAATGACAAT |
| ChIP-qPCR_Chén46_R | ATGGCCTCTGTTTCATCTTGGTCTGAC    |
| ChIP-qPCR_Chén47_F | CTCATGAGGGCTGCCAGATCACAACA     |
| ChIP-qPCR_Chén47_R | CCTGGGAAGGACAAAAGGAGAGGCTAAACT |

**Supplementary Table 4:** Genome browser coordinates; related figures are mentioned in separate column

| Nearest Gene        | Chr   | Start     | End       | Peak-ID                    | Figure               |
|---------------------|-------|-----------|-----------|----------------------------|----------------------|
| <i>Tet2</i>         | chr3  | 133544389 | 133544390 | oct4WT_O4SK_d1_peak_5219   | Fig. 2F, 5D          |
| <i>Col8a1</i>       | chr16 | 57736605  | 57736606  | oct4WT_O4SK_d1_peak_3199a  | Fig. 2F              |
| <i>Svil</i>         | chr18 | 5133709   | 5133710   | oct4WT_O4SK_d1_peak_3593   | Fig. 2F              |
| <i>Ptprt</i>        | chr2  | 162356333 | 162356334 | oct4WT_O4SK_d5_peak_2796   | Fig. 2F              |
| <i>Nfkbia</i>       | chr12 | 55484545  | 55484546  | oct4WT_O4SK_d5_peak_1017   | Fig. 2F              |
| <i>Aoah</i>         | chr13 | 20936246  | 20936247  | oct4WT_O4SK_d1_peak_1983   | Fig. 2F              |
| <i>Zygl1a</i>       | chr4  | 108182510 | 108182511 | oct4WT_O4SK_d7_peak_2521   | Fig. 2F              |
| <i>Sox21</i>        | chr14 | 118230387 | 118230388 | oct4WT_O4SK_d1_peak_2692   | Fig. 2G, 5D          |
| <i>Spata13</i>      | chr14 | 60653441  | 60653442  | oct4WT_O4SK_d1_peak_2507   | Fig. 2G              |
| <i>Sox7</i>         | chr14 | 63929657  | 63929658  | oct4SM_SMSK_d1_peak_28908  | Sup. Fig. 3F         |
| <i>Sox17</i>        | chr1  | 4491943   | 4491944   | oct6MS_MSSK_d1_peak_11a    | Sup. Fig. 3F         |
| <i>Pou3f1</i>       | chr4  | 124657948 | 124657949 | oct6MS_MSSK_d1_peak_15552a | Sup. Fig. 3F         |
| <i>Cnpy1</i>        | chr5  | 28210052  | 28210053  | oct4SM_SMSK_d1_peak_69538  | Sup. Fig. 3F         |
| <i>Sox2</i>         | chr3  | 34650834  | 34650835  | oct6MS_MSSK_d1_peak_13474  | Sup. Fig. 3F         |
| <i>Sox13</i>        | chr1  | 133397732 | 133397733 | oct4SM_SMSK_d1_peak_5058   | Sup. Fig. 3F         |
| <i>Kdm2b</i>        | chr5  | 122900391 | 122900392 | oct4SM_SMSK_d1_peak_73063  | Sup. Fig. 3F         |
| <i>Runx1t1</i>      | chr4  | 13804005  | 13804006  | oct4WT_O4SK_d1_peak_5375   | Sup. Fig. 6E         |
| <i>Hdac4</i>        | chr1  | 91993982  | 91993983  | oct4WT_O4SK_d1_peak_338    | Sup. Fig. 6E         |
| <i>Tenm4</i>        | chr7  | 96723241  | 96723242  | oct4YR_YRSK_d1_peak_25198  | Sup. Fig. 6E         |
| <i>Sox13</i>        | chr1  | 133397766 | 133397767 | oct4WT_O4SK_d1_peak_443    | Sup. Fig. 6E         |
| <i>Ar</i>           | chrX  | 98317702  | 98317703  | oct4WT_O4SK_d1_peak_7888   | Sup. Fig. 6E         |
| <i>Bach2/Map3k7</i> | chr4  | 32176611  | 32176612  | oct4YR_YRSK_d1_peak_19873  | Sup. Fig. 6E         |
| <i>Cnpy1</i>        | chr5  | 28210062  | 28210063  | oct4WT_O4SK_d1_peak_5931   | Fig. 5D, Sup Fig. 7G |
| <i>Pipox</i>        | chr11 | 77894068  | 77894069  | oct4WT_O4SK_d1_peak_1410   | Fig. 5D, Sup Fig. 7G |
| <i>Gdf3</i>         | chr6  | 122608615 | 122608616 | oct4WT_O4SK_d1_peak_6708   | Fig. 5D, Sup Fig. 7G |
| <i>Zmiz2</i>        | chr11 | 6389303   | 6389304   | oct4WT_O4SK_d1_peak_1156   | Fig. 5D, Sup Fig. 7G |
| <i>Gadd45g</i>      | chr13 | 51846606  | 51846607  | oct4WT_O4SK_d1_peak_2115   | Fig. 5D              |
| <i>Kdm2b</i>        | chr5  | 122900401 | 122900402 | oct4WT_O4SK_d1_peak_6204   | Fig. 5D              |
| <i>Rfx4/Ric8b</i>   | chr10 | 84913371  | 84913372  | oct6WT_O6SK_d1_peak_1436   | Sup. Fig. 9C         |
| <i>Sox21</i>        | chr14 | 118226221 | 118226222 | oct6WT_O6SK_d1_peak_4001   | Sup. Fig. 9C         |
| <i>Pou3f1</i>       | chr4  | 124658719 | 124658720 | oct6WT_O6SK_d1_peak_8933c  | Sup. Fig. 9C         |

**Supplementary Table 5:** EMSA probes; related to Figure 2I

| Probe name               | Sequence 5'→3'                          |
|--------------------------|-----------------------------------------|
| <i>MORE</i> -Spata13-CY5 | AGGGT <u>ATGCATATGAAT</u> ACAGA         |
| <i>SoxOct</i> -Sox21-Cy5 | GTAGATTG <u>CATTCTAATGCTAAT</u> CTAGCGT |

**Supplementary Table 6:** cDNA synthesis primers used for reporter assay; related to Figure 2J

| Primer name | Sequence 5'→3'             |
|-------------|----------------------------|
| GFP         | TGTGTCCCAGAATGTTGCCATCTTCC |
| Rpl19       | AAGACTGATCCACATGAGGCCACAGC |

**Supplementary Table 7:** qPCR primers used for reporter assay; related to Figure 2J

| Primer name | Sequence 5'→3'        |
|-------------|-----------------------|
| GFP_F       | GGCCAGCTGTTGGGGTGTC   |
| GFP_R       | TGCATCACCTTCACCCTCTC  |
| Rpl19_F     | ATGTATCACAGCCTGTACCTG |
| Rpl19_R     | CCGCTATGTACAGACACGAG  |

**Supplementary Table 8:** Reporter assay sequences used for ESCs transfection; related to Figure 2J

| Plasmid name       | Sequence 5'→3'                | Genomic location                                | Description                                         | Generated by |
|--------------------|-------------------------------|-------------------------------------------------|-----------------------------------------------------|--------------|
| Negative control 1 | CAGCGAAAGAACATCCTGTGCCCGTCGCT | hg19;<br>chr6:<br>35,699,789<br>-<br>35,699,815 | GR binding site                                     | gBlock (IDT) |
| Negative control 2 | CAGCGAAAGAAACTCCGTTGCCCGTCGCT | NA                                              | GR binding site with scrambled GR recognition motif | gBlock (IDT) |



|                            |                                                                                                                                                                                                                                                                                                                                                                                                                                                                                                                                                                                                                                                                                                                                                                      |                                                 |                                                                                          |                                            |
|----------------------------|----------------------------------------------------------------------------------------------------------------------------------------------------------------------------------------------------------------------------------------------------------------------------------------------------------------------------------------------------------------------------------------------------------------------------------------------------------------------------------------------------------------------------------------------------------------------------------------------------------------------------------------------------------------------------------------------------------------------------------------------------------------------|-------------------------------------------------|------------------------------------------------------------------------------------------|--------------------------------------------|
| Negative control 3         | CAGCGAAAGAACA AAAATGTTCTCGTCGCT                                                                                                                                                                                                                                                                                                                                                                                                                                                                                                                                                                                                                                                                                                                                      | NA                                              | synthetic palindromic GR binding site                                                    | gBlock (IDT)                               |
| Positive control (CMV enh) | TCAATATTGGCCATTAGCCATATTATTCAT<br>TGGTTATATAGCATAAAATCAATATTGGCTA<br>TTGGCCATTGCATACGTTGTATCTATATCA<br>TAATATGTACATTTATATTGGCTCATGTCC<br>AATATGACCGCCATGTTGGCATTGATTATT<br>GACTAGTTATTAATAGTAATCAATTACGGG<br>GTCATTAGTTCATAGCCCATATATGGAGTT<br>CCGCGTTACATAACTTACGGTAAATGGCCC<br>GCCTGGCTGACCGCCAACGACCCCCGCC<br>ATTGACGTCAATAATGACGTATGTTCCCAT<br>AGTAACGCCAATAGGGACTTTCATTGACG<br>TCAATGGGTGGAGTATTTACGGTAAACTGC<br>CCACTTGGCAGTACATCAAGTGTATCATAT<br>GCCAAGTCCGCCCCCTATTGACGTCAATGA<br>CGGTAAATGGCCCGCTGGCATTATGCCCA<br>GTACATGACCTTACGGGACTTTCCTACTTG<br>GCAGTACATCTACGTATTAGTCATCGCTAT<br>TACCATGGTGATGCGGTTTTGGCAGTACAC<br>CAATGGGCGTGGATAGCGGTTTGACTCAC<br>GGGGATTTCCAAGTCTCCACCCCATGACG<br>TCAATGGGAGTTTGTGTTTGGCACAAAATC<br>AACGGGACTTTCAAAATGTCGTAACA AACT | NA                                              | viral enhancer of transcription                                                          | gBlock (IDT)                               |
| Sox21                      | GTGTGAGTGAGTGTTTAAAGAATATATATA<br>AAAAGTTCCCCACTCATTACATAGCTTC<br>ATCCTTACCTTTCCATTCAACCCTAGCAA<br>AAAGCATATCTATTCAAAGCCCTTGCAAAA<br>AGCATATCCATTCAAAGGGCATTAGTCCA<br>TTTCTTTCTTGGCGGGTAAACCTATTCATC<br>AATTGTTCTGCCTTGTAGATTG <b>CATTCTAA</b><br><b>TGCTAAT</b> CTAGCGTGTTAAATATCTTTTTG<br>TTCCCTTTACCGCTTTGTCATTAGTTTA<br>TCCAGTTTTGGTCACCCATTTATTTATTTA<br>TGCGCCTGCTCCTATTCAGGGG                                                                                                                                                                                                                                                                                                                                                                                 | mm10;<br>chr14:<br>118,629,364 -<br>118,629,687 | genomic region near Sox21 gene, constitutively bound by Oct4 encompassing a SoxOct motif | nested PCR                                 |
| Sox21 mut                  | GTGTGAGTGAGTGTTTAAAGAATATATATA<br>AAAAGTTCCCCACTCATTACATAGCTTC<br>ATCCTTACCTTTCCATTCAACCCTAGCAA<br>AAAGCATATCTATTCAAAGCCCTTGCAAAA<br>AGCATATCCATTCAAAGGGCATTAGTCCA<br>TTTCTTTCTTGGCGGGTAAACCTATTCATC<br>AATTGTTCTGCCTTGTAGATTG <b>CATTCTAC</b><br><b>CCGTAGT</b> CTAGCGTGTTAAATATCTTTTTG<br>TTCCCTTTACCGCTTTGTCATTAGTTTA<br>TCCAGTTTTGGTCACCCATTTATTTATTTA                                                                                                                                                                                                                                                                                                                                                                                                           | NA                                              | genomic region near Sox21 gene, constitutively bound by Oct4 encompassing a              | side directed mutagenesis of Sox21 plasmid |

|                |                                                                                                                                                                                                                                                                                                                                                                                                                                                                                                                                 |                                                  |                                                                                                                                               |                                                             |
|----------------|---------------------------------------------------------------------------------------------------------------------------------------------------------------------------------------------------------------------------------------------------------------------------------------------------------------------------------------------------------------------------------------------------------------------------------------------------------------------------------------------------------------------------------|--------------------------------------------------|-----------------------------------------------------------------------------------------------------------------------------------------------|-------------------------------------------------------------|
|                | TGCGCCTGCTCCTATTCAGGGG                                                                                                                                                                                                                                                                                                                                                                                                                                                                                                          |                                                  | mutated<br><i>SoxOct</i><br>motif                                                                                                             |                                                             |
| Spata13        | CTAAAGTCATAAAGGATGATTGGCCTCTGGT<br>TGTTGGGGTTGGCTGTTTCGAGACACTGAGG<br>GTGTCAGCAGGCTGAACTTGAACCTGTGAC<br>GTTTCATGCTTTAGCTTCCTGAACAGTGGGA<br>TCCAGGTGTGGCTCACCTTGCCCCAGCTGC<br>TGCGTTTTTCAGCTTGGGTAGTGTCTTTCCCT<br>GCTTTTGTGTCAGGGT <b><u>ATGCATATGAAT</u></b><br>ACAGATCTGAAGAGCAGATGTCCATGACT<br>TGTGCATATGGATATGCATACCATGACTGT<br>TATTTTAAACATGTGCCTAAGTATAGTGGA<br>GAGTGGGACAGGAGGCAGCGTCCTGGGAT<br>CCAACCTCTGGCTGTTTGGAAATGAGCTGAG<br>TGCTCTGTTCTGAGGCCTTTTGTCTGTCGCC<br>CCCCATATAATATAGGGTTAGTTTAAAGCC<br>AAGGAATAAAAGTATAG | Mm10;<br>chr14:<br>61,272,074<br>-<br>61,272,509 | genomic<br>region<br>near<br>Spata13<br>gene,<br>constitutiv<br>ely bound<br>by Oct4<br>encompass<br>ing a<br><i>MORE</i><br>motif            | nested<br>PCR                                               |
| Spata13<br>mut | CTAAAGTCATAAAGGATGATTGGCCTCTGGT<br>TGTTGGGGTTGGCTGTTTCGAGACACTGAGG<br>GTGTCAGCAGGCTGAACTTGAACCTGTGAC<br>GTTTCATGCTTTAGCTTCCTGAACAGTGGGA<br>TCCAGGTGTGGCTCACCTTGCCCCAGCTGC<br>TGCGTTTTTCAGCTTGGGTAGTGTCTTTCCCT<br>GCTTTTGTGTCAGGGT <b><u>ATCCAGCTGACG</u></b><br>ACAGATCTGAAGAGCAGATGTCCATGACT<br>TGTGCATATGGATATGCATACCATGACTGT<br>TATTTTAAACATGTGCCTAAGTATAGTGGA<br>GAGTGGGACAGGAGGCAGCGTCCTGGGAT<br>CCAACCTCTGGCTGTTTGGAAATGAGCTGAG<br>TGCTCTGTTCTGAGGCCTTTTGTCTGTCGCC<br>CCCCATATAATATAGGGTTAGTTTAAAGCC<br>AAGGAATAAAAGTATAG | NA                                               | genomic<br>region<br>near<br>Spata13<br>gene,<br>constitutiv<br>ely bound<br>by Oct4<br>encompass<br>ing a<br>mutated<br><i>MORE</i><br>motif | side<br>directed<br>mutagenesis<br>of<br>Spata13<br>plasmid |

**Supplementary Table 9:** qPCR primers used for the detection of endogenous Oct4; related to Supplementary Figure 4A

| Primer name     | Sequence 5'→3'             |
|-----------------|----------------------------|
| endo-mOct4-RT-F | TAGGTGAGCCGTCTTTCCAC       |
| endo-mOct4-RT-R | GCTTAGCCAGGTTCGAGGAT       |
| mActin-RT-F     | TGCTAGGAGCCAGAGCAGTA       |
| mActin-RT-R     | AGTGTGACGTTGACATCCGT       |
| mGAPDH-RT-F     | AACTTTGGCATTGTGGAAGGGCTCA  |
| mGAPDH-RT-R     | TTGGCAGCACCCAGTGGATGCAGGGA |

**Supplementary Table 10:** qPCR primers used for marker gene quantification in ZHBTc4 ES cells; related to Figure 5G

| Primer name | Sequence 5'→3'            |
|-------------|---------------------------|
| Oct4-CDS-F  | GGCTAGAGAAGGATGTGGTTTCGAG |
| Oct4-CDS-R  | CCTGGGAAAGGTGTCCCTGTAG    |
| Sox2-F      | ACGGCCATTAACGGCACACT      |
| Sox2-R      | TTTTGCACCCCTCCCAATTC      |
| Nanog-F     | CTTTCACCTATTAAGGTGCTTGC   |
| Nanog-R     | ATGGCATCGGTTTCATCATGGTAC  |
| Esrrb-F     | GCCTTTACTATCTGTGCCTGGT    |
| Esrrb-R     | TAGTGCTTCTCTTTGGTGCTGT    |
| Rex1-F      | GGCTGCGAGAAGAGCTTTATTCA   |
| Rex1-R      | AGCATTCTTCCCGGCCTTT       |
| Cdx2-F      | ACCGGAATTGTTTGCTGCTGT     |
| Cdx2-R      | TCCCGACTTCCCTTCACCAT      |
| Rpl37a-F    | ACTTGCTCCTTCTGTGGCAAGAC   |
| Rpl37a-R    | TTCATGCAGGAACCACAGTGC     |

**Supplementary Table 11: Antibodies used in the study**

| Antibodies                                  | Source                    | Identifier  | Application and usage                              |
|---------------------------------------------|---------------------------|-------------|----------------------------------------------------|
| Oct-3/4 (N-19) X                            | Santa Cruz Biotechnology  | Sc-8628 X   | ChIP-seq (Total 10µg, 1:20), Western Blot (1:5000) |
| Oct-6 (C-20) X                              | Santa Cruz Biotechnology  | Sc-11661 X  | ChIP-seq (Total 10µg, 1:20), Western Blot (1:5000) |
| Sox-2 Antibody (Y-17) X                     | Santa Cruz Biotechnology  | sc-17320 X  | ChIP-seq (Total 10µg, 1:20)                        |
| Sox2 Antibody                               | Cell Signaling Technology | 2748s       | ChIP-seq (Total 10µg, 1:1)                         |
| Actin (I-19)-R                              | Santa Cruz Biotechnology  | Sc-1616-R   | Western Blot (1:500)                               |
| IRDye® 800CW Donkey anti-Goat IgG (H + L)   | LI-COR                    | 926-32214   | Western Blot (1:10,000)                            |
| IRDye® 680RD Donkey anti-Rabbit IgG (H + L) | LI-COR                    | 926-68073   | Western Blot (1:10,000)                            |
| Cdx2                                        | New England Biolabs       | 3977S       | ICC (1:1000)                                       |
| anti-Nanog                                  | eBioscience               | eBioMLC-51  | ICC (1:500, Figure 5F)                             |
| anti-Oct4                                   | Santa Cruz Biotechnology  | sc-8628     | ICC (1:500, Figure 5F)                             |
| anti-Nanog                                  | Novus Biologicals         | NB100-58842 | ICC (1:500, Figure 1B, Sup. Fig. 1B)               |
| NucBlue Fixed Cell Stain (DAPI)             | Thermo Fisher Scientific  | R37606      | ICC (1:50, Sup. Fig. 1B)                           |
| Anti-Cdh1 (ANTI-CD324 DECMA1 EF660)         | Thermo Fisher Scientific  | 50-3249-82  | FACS (1:40)                                        |
| Mouse IgG1, κ Isotype Control               | BD biosciences            | 555746      | FACS (1:10)                                        |
| DAPI                                        | BD biosciences            | 564907      | FACS (1:1000)                                      |

## Supplementary references

- 1 Li, D. *et al.* Chromatin Accessibility Dynamics during iPSC Reprogramming. *Cell stem cell* 21, 819-833 e816, doi:10.1016/j.stem.2017.10.012 (2017).
- 2 Chen, X. *et al.* Integration of external signaling pathways with the core transcriptional network in embryonic stem cells. *Cell* 133, 1106-1117, doi:10.1016/j.cell.2008.04.043 (2008).
- 3 Knaupp, A. S. *et al.* Transient and Permanent Reconfiguration of Chromatin and Transcription Factor Occupancy Drive Reprogramming. *Cell stem cell* 21, 834-845 e836, doi:10.1016/j.stem.2017.11.007 (2017).
- 4 Chronis, C. *et al.* Cooperative Binding of Transcription Factors Orchestrates Reprogramming. *Cell* 168, 442-459 e420, doi:10.1016/j.cell.2016.12.016 (2017).
- 5 Shen, Y. *et al.* A map of the cis-regulatory sequences in the mouse genome. *Nature* 488, 116-120, doi:10.1038/nature11243 (2012).
- 6 Niwa, H., Miyazaki, J. & Smith, A. G. Quantitative expression of Oct-3/4 defines differentiation, dedifferentiation or self-renewal of ES cells. *Nature genetics* 24, 372-376, doi:10.1038/74199 (2000).
- 7 Yue, F. *et al.* A comparative encyclopedia of DNA elements in the mouse genome. *Nature* 515, 355-364, doi:10.1038/nature13992 (2014).
- 8 Giresi, P. G., Kim, J., McDaniell, R. M., Iyer, V. R. & Lieb, J. D. FAIRE (Formaldehyde-Assisted Isolation of Regulatory Elements) isolates active regulatory elements from human chromatin. *Genome research* 17, 877-885, doi:10.1101/gr.5533506 (2007).
- 9 Fang, H. T. *et al.* Global H3.3 dynamic deposition defines its bimodal role in cell fate transition. *Nature communications* 9, 1537, doi:10.1038/s41467-018-03904-7 (2018).
- 10 Guttman, M. *et al.* Ab initio reconstruction of cell type-specific transcriptomes in mouse reveals the conserved multi-exonic structure of lincRNAs. *Nature biotechnology* 28, 503-510, doi:10.1038/nbt.1633 (2010).
