# Supplementary material for: Pluripotency reprogramming by competent and incompetent POU factors uncovers temporal dependency for Oct4 and Sox2
Source: PubMed Central journal article supplement (PMC6677745; doi:10.1038/s41467-019-11054-7), 2019-08-02
Supplement: 41467_2019_11054_MOESM4_ESM.pdf [file 41467_2019_11054_MOESM4_ESM.pdf]

## Description of Additional Supplementary Files

**Supplementary Data 1.** This table contains the list of differentially expressed genes in Oct4-SK, Oct4<sup>defSox2</sup> and Oct6-SK conditions when compared with GFP-SK conditions at days 0, 1, 3, 5 and 8 of reprogramming process. Related to Figures S2D-E.

**Supplementary Data 2.** This is an excel workbook that contains genomic coordinates of peaks for Figures 2A, 4B, 4D, 4E, 4F, 6A, S4C, S4E, S5E, S5F, S6A, S7A on different excel sheets.
